# Supplementary material
Source: PubMed Central journal article supplement (PMC4292470)
Supplement: AEM.03322-14_zam999105981so1.pdf [file AEM.03322-14_zam999105981so1.pdf]

Supporting Information

1  
2  
3  
4  
5  
6  
7

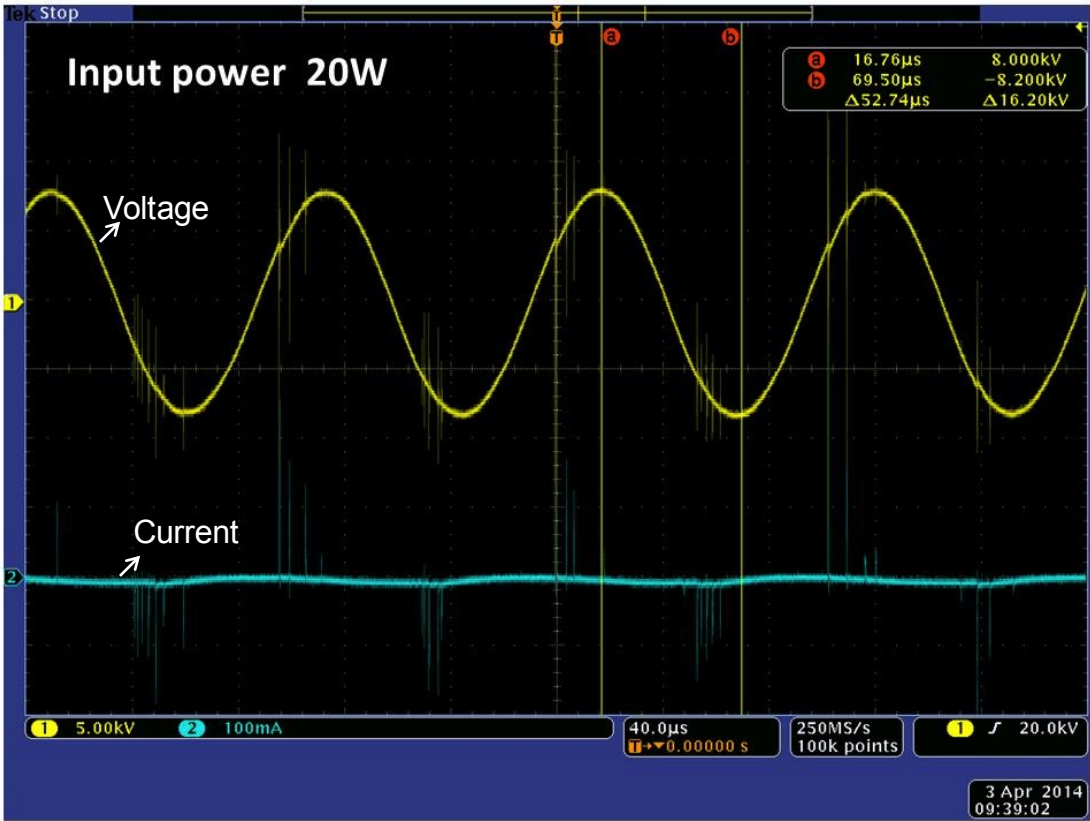

8  
9

10 **Fig S1** The waveforms of voltage and current ; plasma generation power:  
11 20 Watts.

12  
13  
14  
15  
16  
17  
18  
19  
20  
21  
22

23  
24  
25  
26  
27  
28  
29  
30

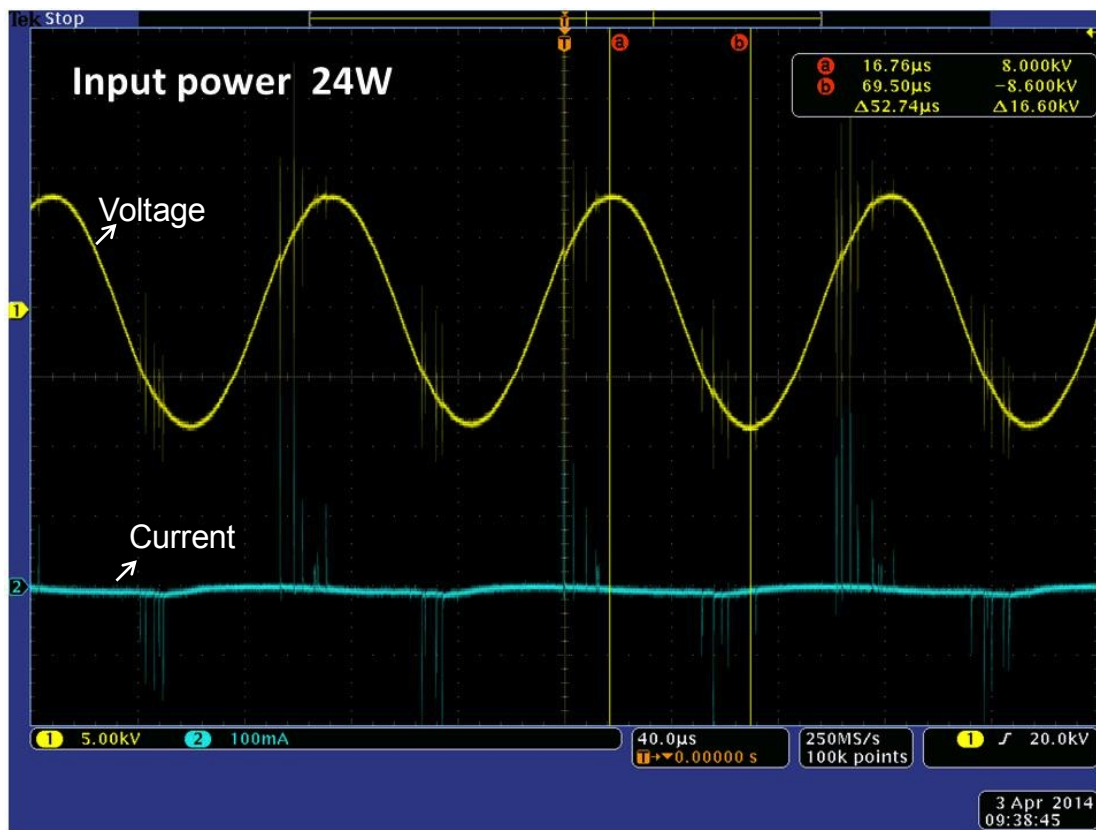

31  
32

33 **Fig S2** The waveforms of voltage and current; plasma generation  
34 power: 24 Watts.

35  
36  
37  
38  
39  
40  
41  
42  
43  
44  
45

46  
47  
48  
49  
50  
51  
52

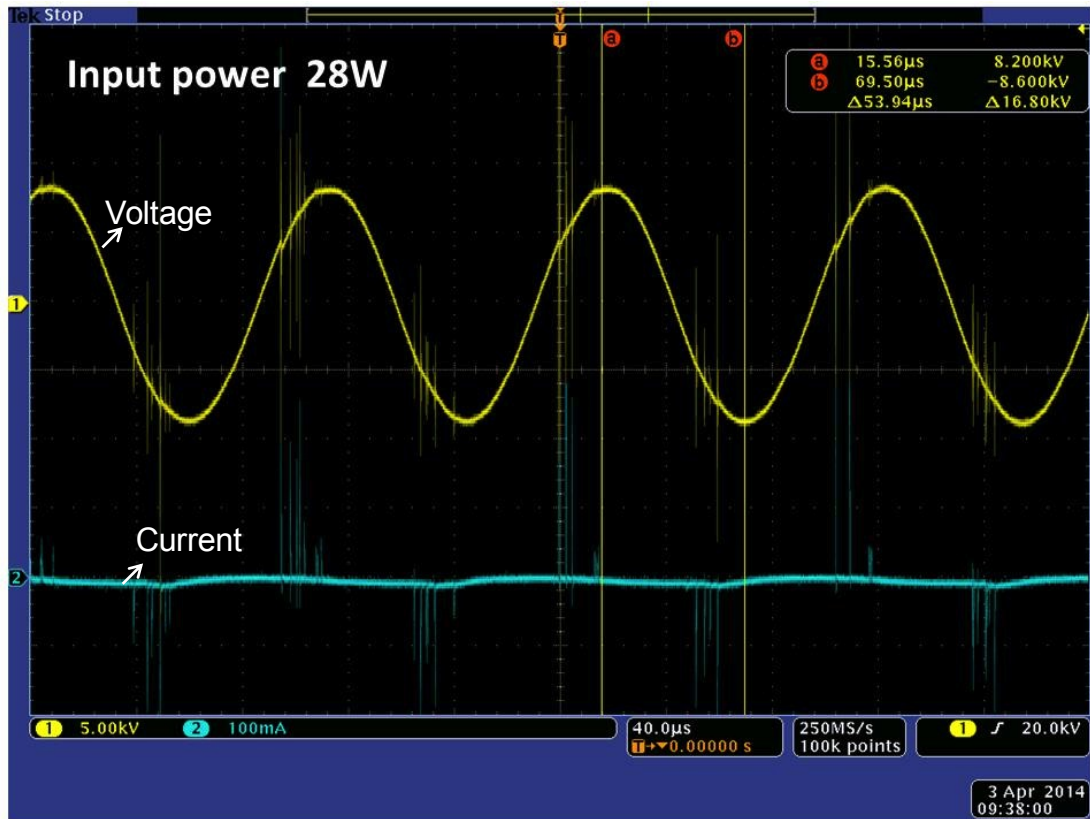

53  
54

55 **Fig S3** The waveforms of voltage and current; plasma generation  
56 power: 28 Watts.

57  
58  
59  
60  
61  
62

63  
64  
65  
66  
67  
68

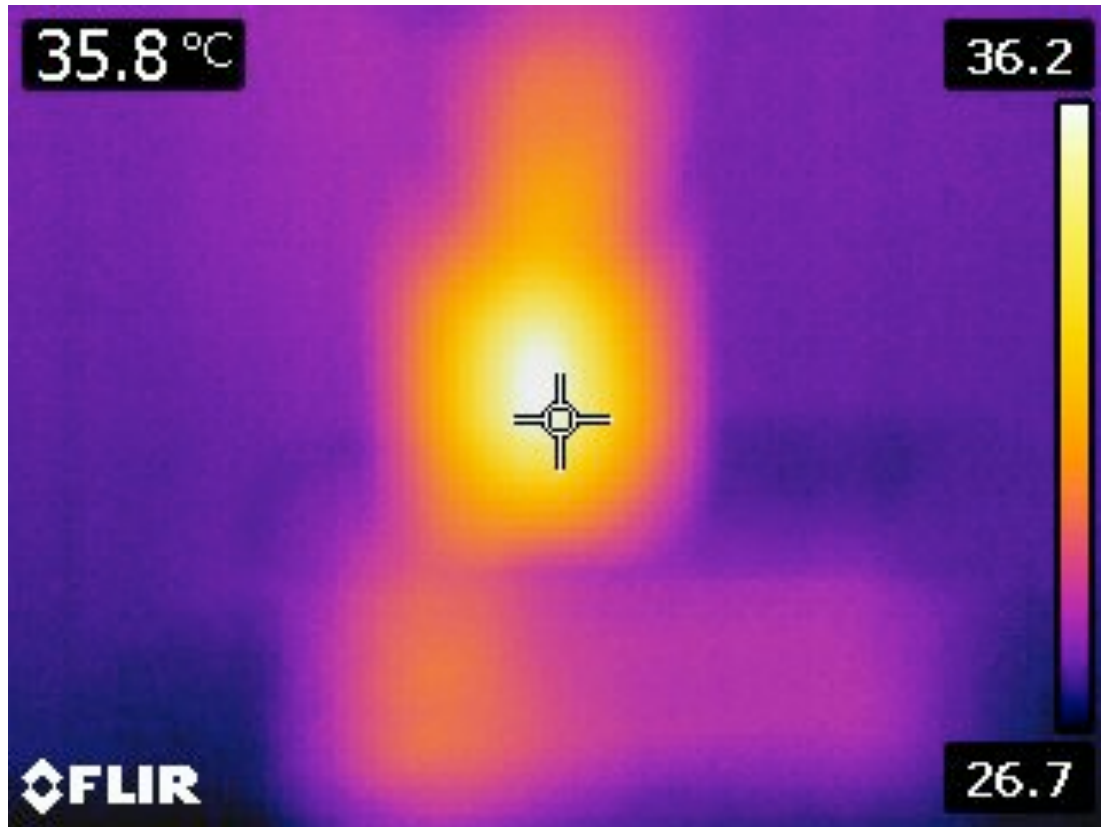

69  
70  
71  
72  
73  
74  
75  
76  
77  
78  
79  
80  
81  
82  
83  
84  
85  
86  
87

**Fig S4** Temperature profile measured using Thermal Imaging Infrared Cameras (FLIR Systems, Inc.) for the liquid suspension treated by micro-jet plasma generation device for inactivating liquid-borne MS2 viruses.

88  
89  
90  
91  
92  
93

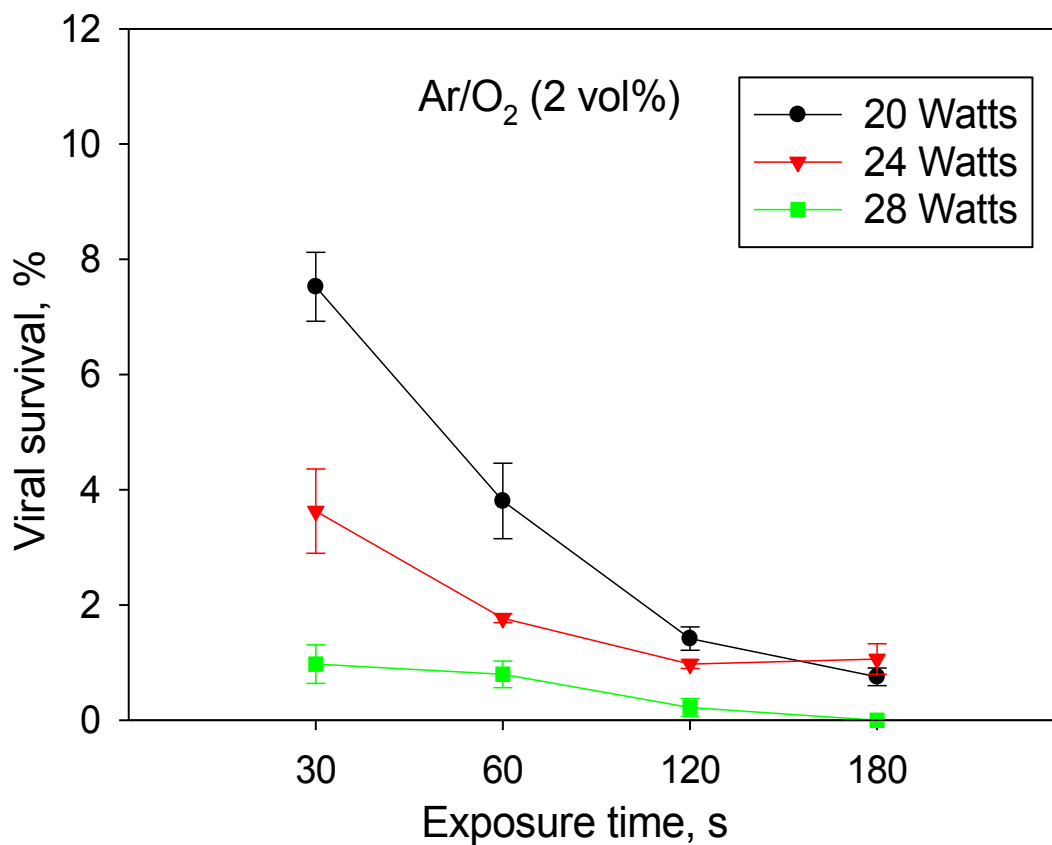

94  
95 **Fig S5** Survival of water-borne MS2 viruses as a function of the APCP  
96 exposure time at different plasma generation power levels with Ar/O<sub>2</sub> (2  
97 vol %) as a plasma gas carrier. Data points and error bars represent  
98 respectively the averages and standard deviations from three  
99 independent measurements.

100  
101  
102  
103

104

105

106

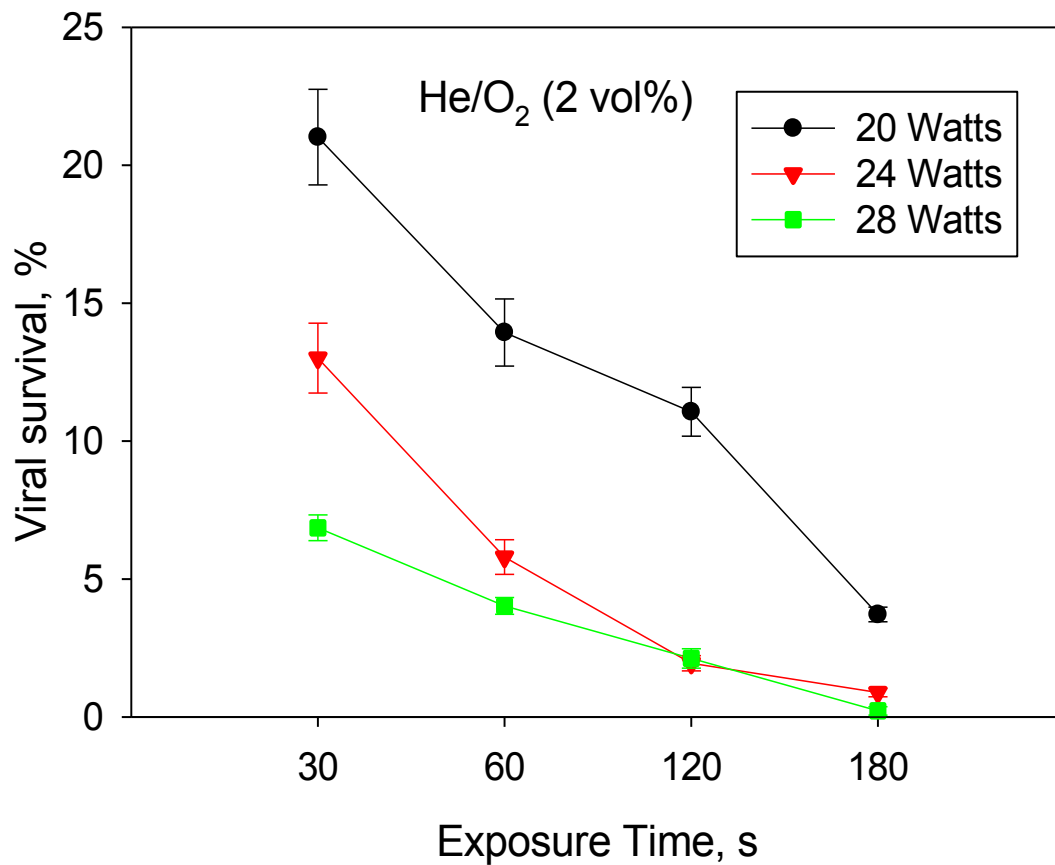

107

108 **Fig S6** Survival of water-borne MS2 viruses as a function of the APCP  
109 exposure time at different energy levels with He/O<sub>2</sub> (2 vol %) as a plasma  
110 gas carrier. Data points and error bars represent respectively the  
111 averages and standard deviations from three independent  
112 measurements.

113

114

115

116
